# Supplementary material for: Flexible MXene nanosheet/multiwall carbon nanotube-reinforced poly (vinylidene fluoride-hexafluoropropylene)–polymethyl methacrylate composites for energy storage and EMI shielding
Source: Royal Society of Chemistry journal article supplement (doi:10.1039/d5ra09486k), 2026-01-01
Supplement: d5ra09486k1.pdf [file d5ra09486k1.pdf]

## Supplimentary Material

### **Flexible MXene Nanosheet/Multiwall Carbon Nanotube-Reinforced Poly(vinylidene fluoride hexafluoropropylene)-Polymethyl Methacrylate Composites for Energy Storage and EMI Shielding**

**Nitesh Kumar Nath<sup>a</sup>, Rajanikanta Parida<sup>b</sup>, Bichitra Nanda Parida<sup>c</sup>, Dibyaranjan Das<sup>d</sup>,**

**S. K. S. Parashar<sup>d</sup>, and Nimai C. Nayak<sup>\*a</sup>**

<sup>a</sup>Micro and Nano Materials Laboratory, Department of Chemistry, Faculty of Engg & Technology (ITER), Siksha'O'Anusandhan (Deemed to be University), Khandagiri Square, Bhubaneswar, Odisha-751030, India.

<sup>b</sup>Department of physics, Faculty of Engg & Technology (ITER), Siksha'O'Anusandhan (Deemed to be University), Khandagiri Square, Bhubaneswar, Odisha-751030, India.

<sup>c</sup>Central Institute of Technology, Kokrajhar (Deemed to be University, MHRD, Govt. of India) BTAD, Assam-783370, India

<sup>d</sup>Nanosensor Lab, School of Applied Sciences, Kalinga Institute of Industrial Technology (KIIT) Deemed to be University, Campus-3, Bhubaneswar, Odisha, 751024, India

*\*to whom correspondence should be made; [nimainayak@soa.ac.in](mailto:nimainayak@soa.ac.in)*

## 1. Mechanism of Conductive network Formation

The Figure S1 depicts the hybrid conductive network and polymer-filler interactions in the composite. The PVDF-HFP matrix provides a ferroelectric, polar environment rich in  $-\text{CF}_2$  dipoles, while PMMA domains enhance blend compatibility and regulate dielectric loss through dipole-dipole interactions between PMMA carbonyl ( $\text{C}=\text{O}$ ) groups and PVDF-HFP chains. MXene sheets, decorated with surface terminations ( $-\text{O}$ ,  $-\text{OH}$ ,  $-\text{F}$ ), interact strongly with the polymer chains via hydrogen bonding and electrostatic interactions, ensuring good interfacial adhesion. MWCNTs, with their high aspect ratio, act as 1D conductive bridges between MXene sheets, suppressing MXene restacking and enabling the formation of a 3D percolative conductive network.

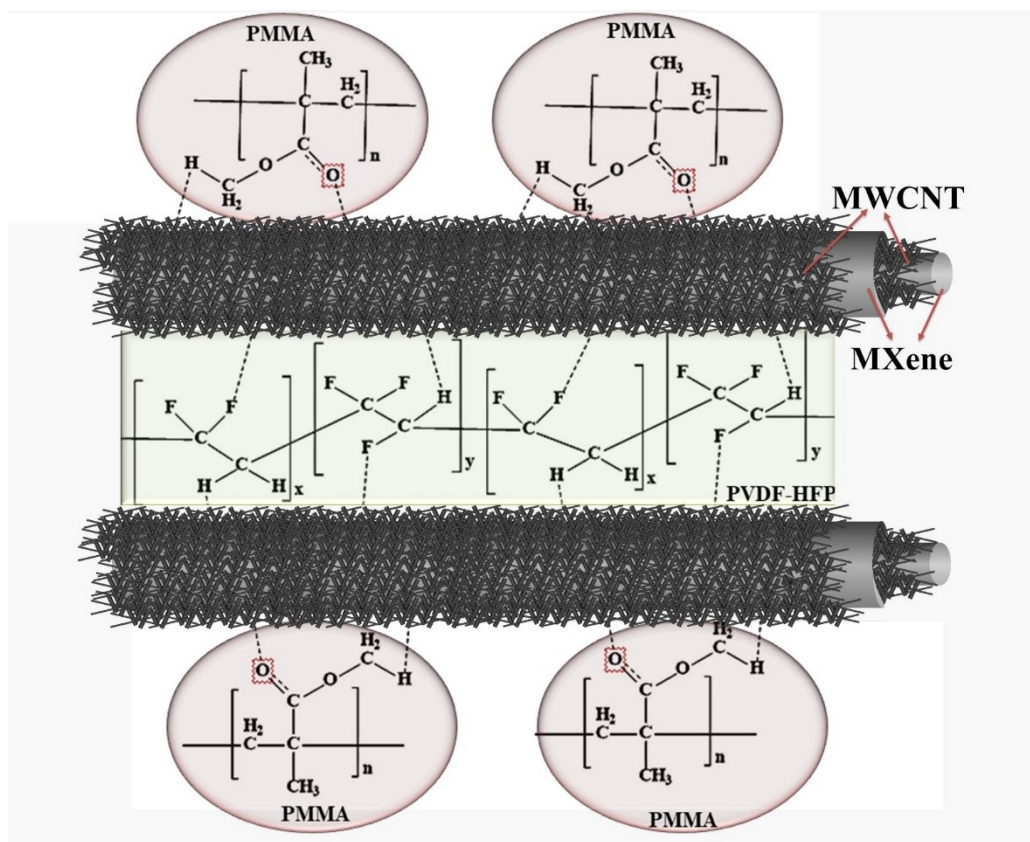

**Figure S1.** This schematic provides polymer-filler interactions which strengthens the mechanistic interpretation of the experimental results.

## 2. Functionalization of $\text{Ti}_3\text{C}_2\text{T}_x$ MXene & MWCNTs

The XRD, FT-IR and Raman patterns of  $\text{Ti}_3\text{C}_2\text{T}_x$  MXenes are shown in Figure S2(a-c), respectively. In our earlier research, we had previously addressed the characteristics of MXene [1]. The new peaks were simultaneously found at  $2\theta$  of  $8.9^\circ$  and  $18.5^\circ$ , indicating that F had been added to the interlayer of MXenes. Additionally, a novel peak at  $27.54^\circ$  was found and identified as  $\text{Ti}_3\text{C}_2(\text{OH})_2$  [2]. In accordance with these results, the surfaces were modified with -OH and -F functional groups followed by HF etching. Broad absorption is facilitated by the stretching of O-H from surface functional groups at about  $3446\text{ cm}^{-1}$ . There is a peak at about  $1624\text{ cm}^{-1}$  (H-O-H bending), and bands at approximately  $600\text{-}800\text{ cm}^{-1}$  reflect Ti-O and Ti-C vibrations. Strong peaks that represent Ti, C, and surface terminations are located between  $200$  and  $800\text{ cm}^{-1}$ . There are noticeable peaks at approximately  $271\text{ cm}^{-1}$  and  $600\text{ cm}^{-1}$  that are related to Ti-C vibrations. Figure S2(d) displays surface images of as obtained pure  $\text{Ti}_3\text{C}_2\text{T}_x$  MXenes. A comparable two-dimensional layered structure was developed by removing an Al atom from  $\text{Ti}_3\text{AlC}_2$  after HF etching. The characteristics of f-MWCNTs are depicted in Figure S2(e-h). The XRD pattern, which displays the strongest peak at  $\sim 26.2^\circ$  corresponding to C (002) planes, a characteristic of highly graphitic nature, has been used to demonstrate the structural phase of the MWCNTs. The absorption bands in FT-IR spectra are induced by the existence of C=O ( $1632\text{ cm}^{-1}$ ), and O-H ( $3456\text{ cm}^{-1}$ ). These are related to the presence of water adsorbed on the surface and hydroxyl groups created during the oxidation of nanotubes. The three primary characteristic bands of Raman spectra D ( $1354\text{ cm}^{-1}$ , symmetric), G ( $1588\text{ cm}^{-1}$ , asymmetric), and 2D ( $2650\text{ cm}^{-1}$ , symmetric), which confirm the formation of top-notch MWCNTs [3-4]. As depicted FESEM image, the tubes are several microns long and between  $50\text{-}100\text{ nm}$  thickness. Additionally, MWCNTs are spherical structures with individual carbon nanotubes interconnected within themselves.

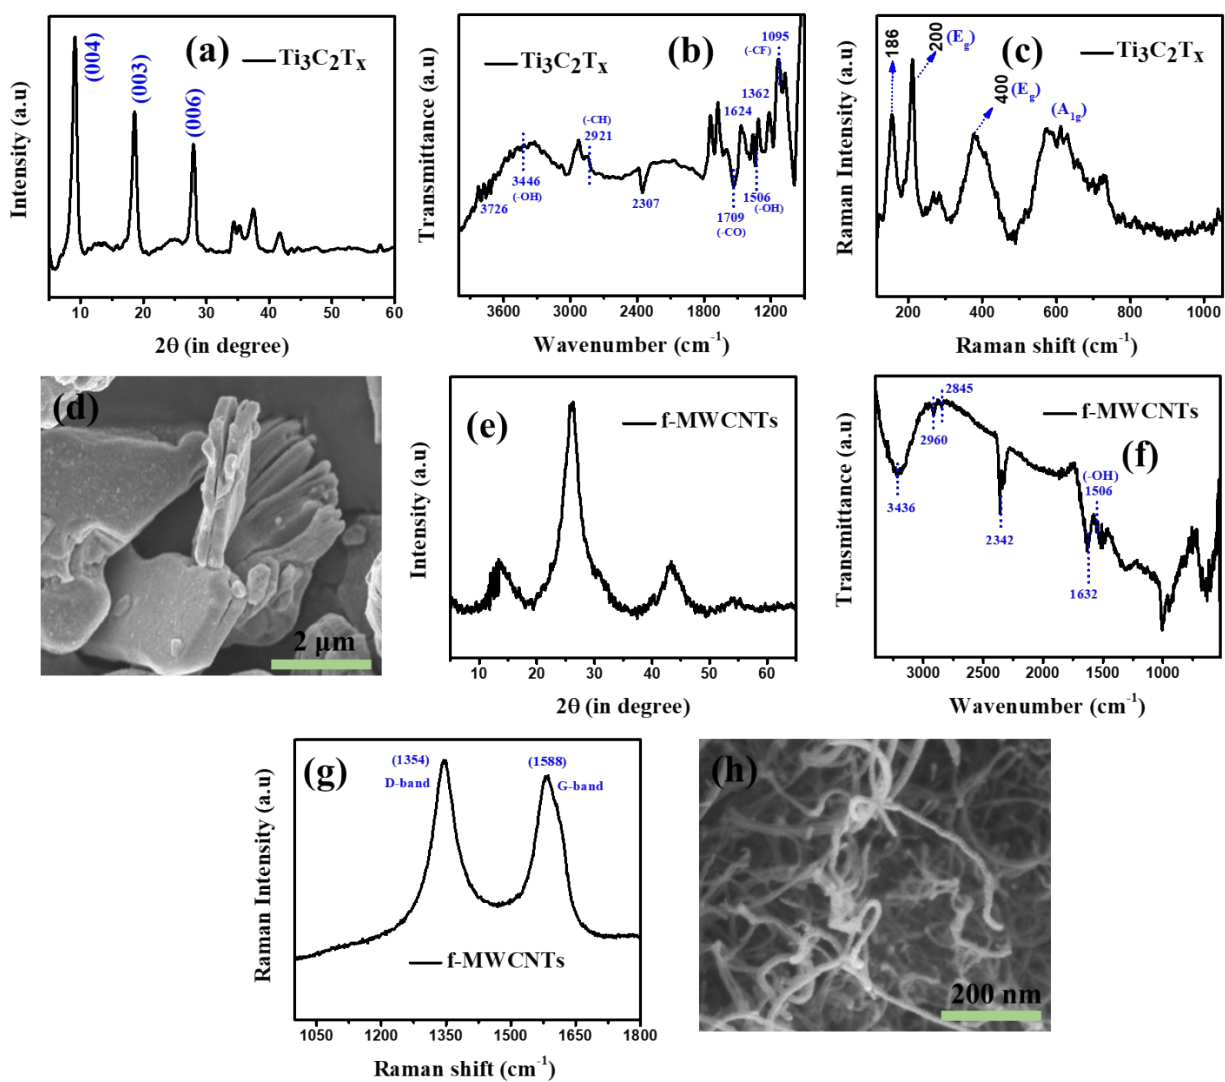

**Figure S2.** (a-d) XRD, FT-IR, Raman and FESEM of  $\text{Ti}_3\text{C}_2\text{T}_x$  MXene, respectively (e-h) XRD, FT-IR, Raman and FESEM of f-MWCNTs, respectively.

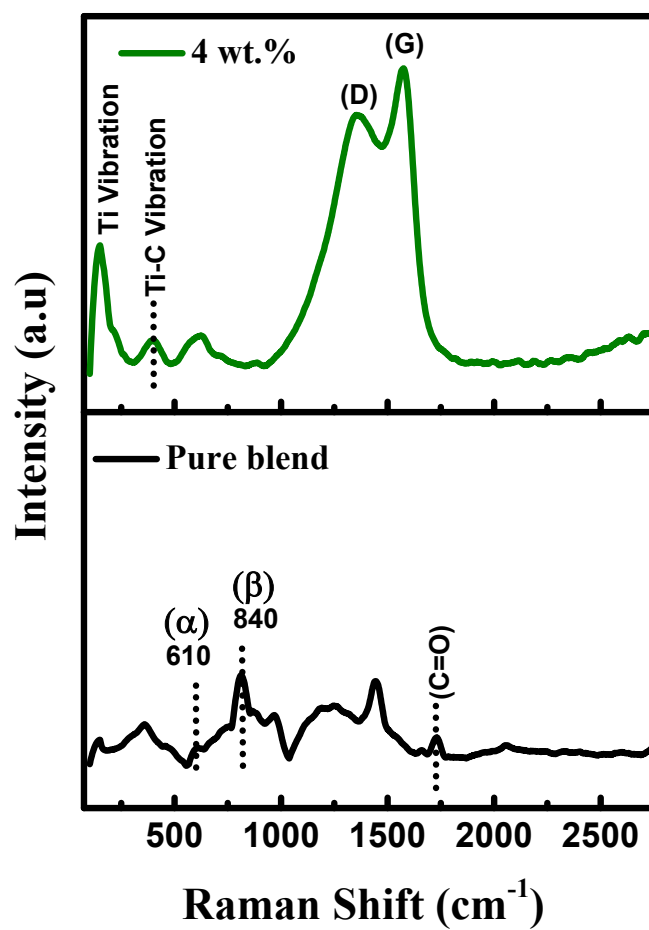

**Figure S3.** Raman spectra of pure blend and 4 wt.% filler loaded composite film, showing characteristic MXene vibrational modes.

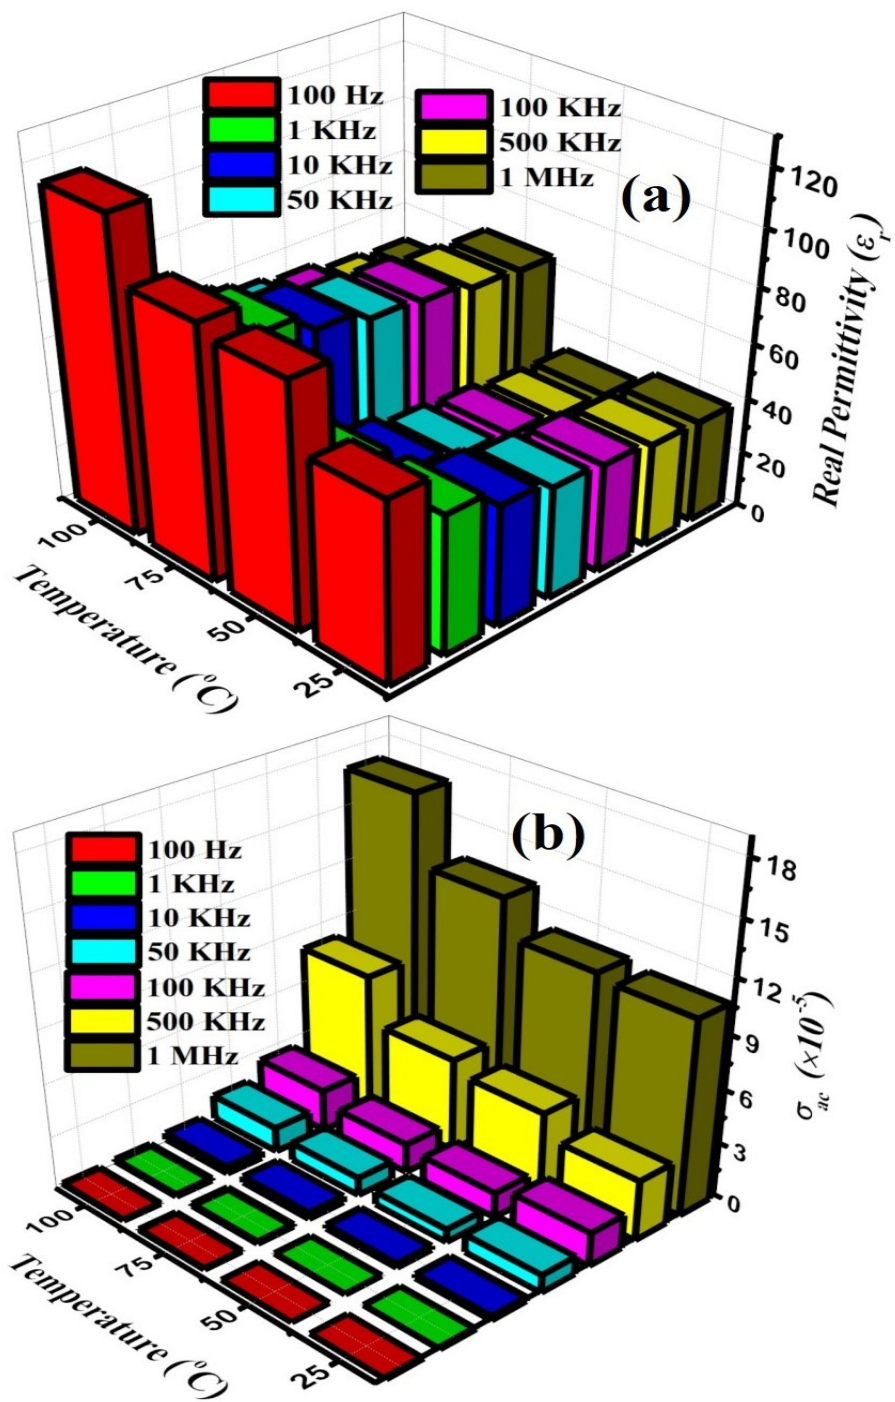

**Figure S4.** Temperature dependent (a)  $\epsilon_r$  and (b)  $\sigma_{ac}$  at different frequency for PNC films.

Table S1. Various fitting parameters used in the Nyquist plot.

| Sample Name | $C_1$ (F) | Q (CPE)<br>(F.s <sup>n-1</sup> ) | n    | $R_1$ ( $\Omega$ ) | $C_2$ (F) | $R_2$ ( $\Omega$ ) |
|-------------|-----------|----------------------------------|------|--------------------|-----------|--------------------|
| Pure blend  | 1.05E-6   | 1.02E-8                          | 0.89 | 1.98E-4            | 9.30E-8   | 1.305E-7           |
| 0.5         | 2.041E-6  | 1.73E-8                          | 0.83 | 1.29E-4            | 2.187E-8  | 2.05E-6            |
| 1.0         | 1.481E-8  | 1.241E-7                         | 0.77 | 1.283E-6           | 1.931E-7  | 1.551E-4           |
| 2.0         | 1.0915E-6 | 2.395E-7                         | 0.75 | 1.246E-8           | 2.475E-8  | 2.421E-6           |
| 4.0         | 2.87E-7   | 1.86E-7                          | 0.71 | 2.501E-5           | 2.854E-6  | 1.359E-6           |

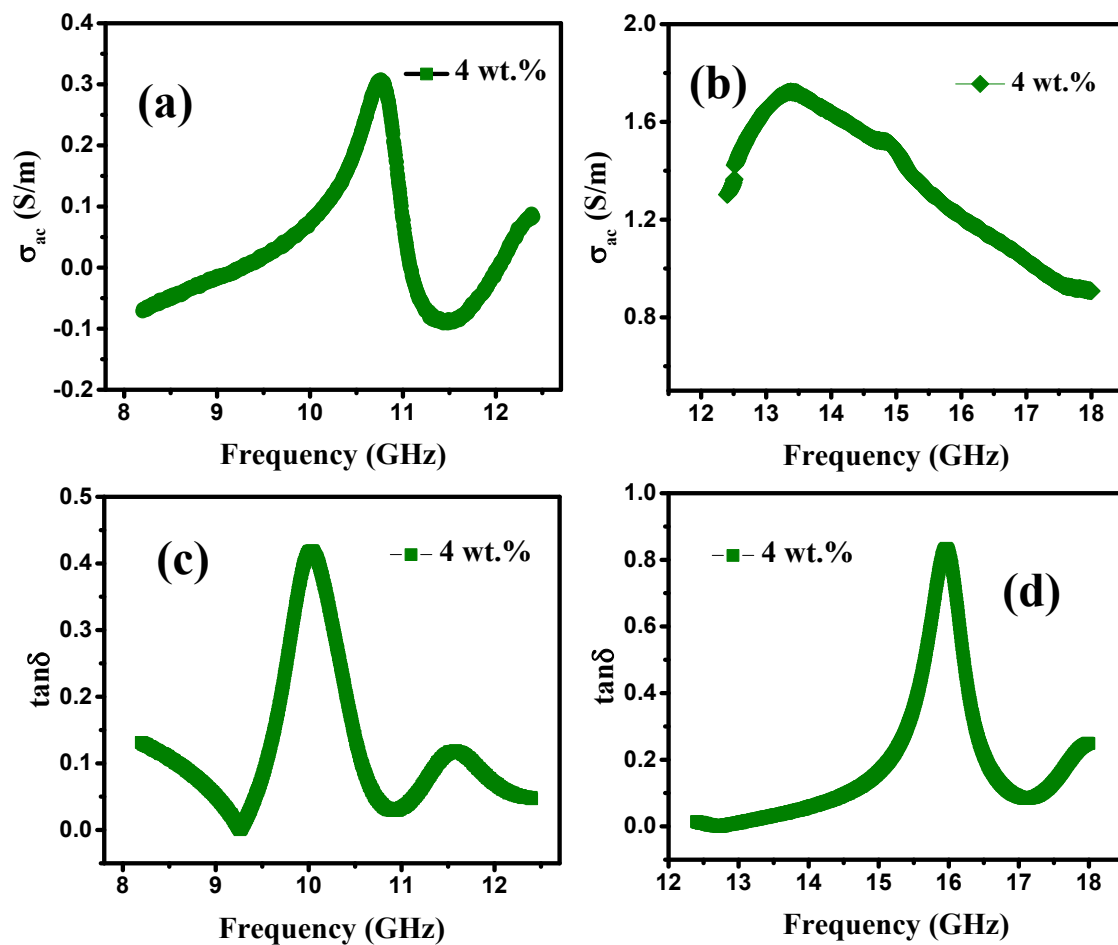

**Figure S5.** (a, b) AC conductivity ( $\sigma_{ac}$ ) plots and (c, d) dielectric loss tangent ( $\tan \delta$ ) of the 4 wt.% composite film in the X-band (8-12 GHz) and Ku-band (12-18 GHz), respectively.



**Table S2.** Comparison of the EMI shielding effectiveness ( $SE_T$ ) of various polymer composites incorporating conductive fillers.

| Polymer Matrix              | Filler                         | Concentration  | Thickness (mm) | Frequency (GHz)     | $SE_T$ (dB)                | Ref. |
|-----------------------------|--------------------------------|----------------|----------------|---------------------|----------------------------|------|
| PVDF                        | MWCNTs/rGO/FeCo                | 10 wt%         | 5              | 12                  | 41.2                       | 5    |
| PVDF                        | Bulk $Ti_3C_2T_x$              | 50 wt%         | 1              | 8-12                | 34.4<br>9                  | 6    |
| PMMA                        | MWCNT                          | 40 wt. %       | -              | 50 MHz-<br>13.5 GHz | 27                         | 7    |
| PVDF foam                   | f-G                            | 5wt. %         | -              | 8-12                | 20                         | 8    |
| PVDF                        | CNT/BT-GO                      | 3wt. %/5vol. % | 1              | 8-18                | 31                         | 9    |
| PVDF                        | MWCNT                          | -              | 0.9            | 8-12                | -8                         | 10   |
| PVDF                        | Carbonyl Fe powder             | 50 vol. %      | 1.2            | 8.2-12.4            | 20                         | 11   |
| PVDF                        | $CoFe_2O_4$ and<br>$BaFe_2O_4$ | 33.33 wt. %    | 2              | 8-12                | 16.5<br>9 and<br>12.3<br>3 | 12   |
| PVA                         | MX- $Ti_3C_2T_x$               | 13.9           | 0.025          | 12-18               | 37.1                       | 13   |
| PMMA<br>wrapped<br>PVDF/ABS | MWCNT                          | 3              | 5.6            | 8-18                | 32                         | 14   |
| PVA                         | MWCNT-Graphene                 | 10             | 1              | 1-2                 | 32.8                       | 15   |
| MXene-<br>CNT<br>(gradient) | MXene + CNT                    | -              | -              | 8-12                | 40                         | 16   |

|               |              |         |      |       |           |           |
|---------------|--------------|---------|------|-------|-----------|-----------|
| PVDF-HFP/PMMA | -            | -       | 0.33 | 12-18 | 16.9      | This work |
| PVDF-HFP/PMMA | MWCNts-MXene | 4 wt. % | 0.35 | 12-18 | 40.0<br>4 | This work |

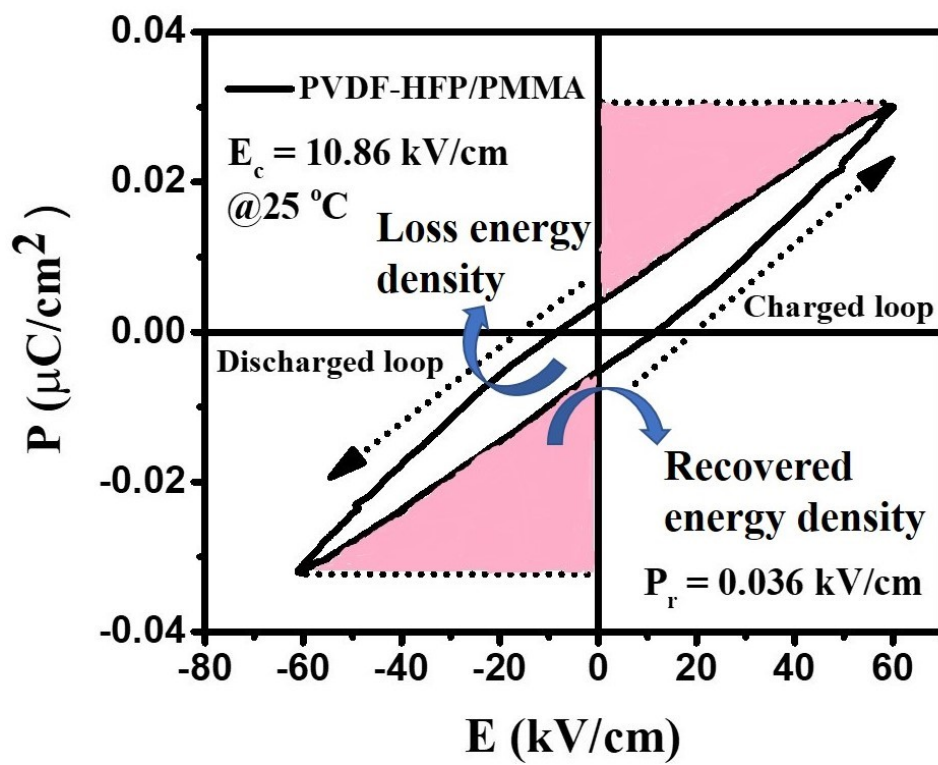

**Figure S6.** Charging and discharging curves of the pure PVDF-HFP/PMMA blend.

## References

1. Nath, N. K., Parida, R., Parida, B. N. & Nayak, N. C. Synergistic effects of MWCNT–MXENE nanohybrids on dielectric and ferroelectric properties of PVDF/PMMA blend composites. *ACS Applied Electronic Materials* (2025). doi:10.1021/acsaelm.4c02179.
2. Li, Y., Zhou, X., Wang, J., Deng, Q., Li, M., Du, S., Han, Y.-H., Lee, J. & Huang, Q. Facile preparation of in situ coated  $\text{Ti}_3\text{C}_2\text{Tx}/\text{Ni}_0.5\text{Zn}_0.5\text{Fe}_2\text{O}_4$  composites and their electromagnetic performance. *RSC Advances* 7, 24698–24708 (2017).
3. Kandpal, S., Ghosh, T., Rani, C., Tanwar, M., Sharma, M., Rani, S., Pathak, D. K., Bhatia, R., Sameera, I., Jayabalan, J. & Kumar, R. Bifunctional application of Viologen-MOS2-CNT/Polythiophene device as electrochromic diode and Half-Wave rectifier. *ACS Materials Au* 2, 293–300 (2022).
4. Mubarak, N. M.; Yusof, F.; Alkhatib, M. F. The production of carbon nanotubes using two-stage chemical vapor deposition and their potential use in protein purification. *Chemical Engineering Journal* 2011, 168 (1), 461–469. <https://doi.org/10.1016/j.cej.2011.01.045>.
5. Arief, I., Biswas, S. & Bose, S. FeCo-Anchored Reduced Graphene Oxide Framework-Based Soft Composites Containing Carbon Nanotubes as Highly Efficient Microwave Absorbers with Excellent Heat Dissipation Ability. *ACS Applied Materials & Interfaces* 9, 19202–19214 (2017).
6. Rajavel, K., Luo, S., Wan, Y., Yu, X., Hu, Y., Zhu, P., Sun, R. & Wong, C. 2D  $\text{Ti}_3\text{C}_2\text{Tx}$  MXene/polyvinylidene fluoride (PVDF) nanocomposites for attenuation of electromagnetic radiation with excellent heat dissipation. *Composites Part a Applied Science and Manufacturing* 129, 105693 (2019).
7. Kim, H. M., Kim, K., Lee, C. Y., Joo, J., Cho, S. J., Yoon, H. S., Pejaković, D. A., Yoo, J. W. & Epstein, A. J. Electrical conductivity and electromagnetic interference shielding of multiwalled carbon nanotube composites containing Fe catalyst. *Applied Physics Letters* 84, 589–591 (2004).
8. Eswaraiyah, V., Sankaranarayanan, V. & Ramaprabhu, S. Functionalized Graphene–PVDF foam composites for EMI shielding. *Macromolecular Materials and Engineering* 296, 894–898 (2011).

9. Sharma, M., Singh, M. P., Srivastava, C., Madras, G. & Bose, S. Poly(vinylidene fluoride)-Based Flexible and Lightweight Materials for Attenuating Microwave Radiations. *ACS Applied Materials & Interfaces* 6, 21151–21160 (2014).
10. Biswas, S., Arief, I., Panja, S. S. & Bose, S. Absorption-Dominated Electromagnetic Wave Suppressor Derived from Ferrite-Doped Cross-Linked Graphene Framework and Conducting Carbon. *ACS Applied Materials & Interfaces* 9, 3030–3039 (2016).
11. Joseph, N. & Sebastian, M. T. Electromagnetic interference shielding nature of PVDF-carbonyl iron composites. *Materials Letters* 90, 64–67 (2012).
12. Meena, S., Kumari, N., Gahlaut, V., Shekhar, C., Mitra, S. & Dwivedi, U. K. Electrical and EMI shielding studies of ferrite/MWCNTs/PVDF composites. *Journal of Applied Polymer Science* 142, (2024).
13. Jin, X., Wang, J., Dai, L., Liu, X., Li, L., Yang, Y., Cao, Y., Wang, W., Wu, H. & Guo, S. Flame-retardant poly (vinyl alcohol)/MXene multilayered films with outstanding electromagnetic interference shielding and thermal conductive performances. *Chemical Engineering Journal* 380, 122475 (2019).
14. Kar, G.P., Biswas, S., Bose, S., 2015. Simultaneous enhancement in mechanical strength, electrical conductivity, and electromagnetic shielding properties in PVDF–ABS blends containing PMMA wrapped multiwall carbon nanotubes. *Physical Chemistry Chemical Physics* 17, 14856–14865. <https://doi.org/10.1039/c5cp01452b>.
15. Lin, J.-H., Lin, Z.-I., Pan, Y.-J., Huang, C.-L., Chen, C.-K., Lou, C.-W., 2015. Polymer composites made of multi-walled carbon nanotubes and graphene nano-sheets: Effects of sandwich structures on their electromagnetic interference shielding effectiveness. *Composites Part B Engineering* 89, 424–431. <https://doi.org/10.1016/j.compositesb.2015.11.014>
16. Jang, J.M., Kim, J.H., Lee, J., Hong, J., Kim, D.W., Kim, S.J., 2024. Gradient-structured MXene/ZIF/CNT hybrid films for largely enhanced electromagnetic absorption in EMI shielding. *Chemical Engineering Journal* 503, 158691. <https://doi.org/10.1016/j.cej.2024.158691>
